# Supplementary material for: Visual Cortical Plasticity in Retinitis Pigmentosa
Source: PubMed Central journal article supplement — Invest Ophthalmol Vis Sci. Author manuscript; Available in PMC 2019 Sep 16. (PMC6746622; doi:10.1167/iovs.18-25750), 2019-06-03
Supplement: EMS84361-supplement-Supplementary_Fig__S1__S2_and_Table_S1.pdf [file EMS84361-supplement-Supplementary_Fig__S1__S2_and_Table_S1.pdf]

# Visual cortical Plasticity in Retinitis Pigmentosa

Lunghi Claudia<sup>1,2</sup>, Galli Resta Lucia<sup>3</sup>, Binda Paola<sup>2,3</sup>, Cicchini Guido Marco<sup>3</sup>, Placidi Giorgio<sup>4</sup>, Falsini Benedetto<sup>4</sup>, Morrone Maria Concetta<sup>2,5\*</sup>

<sup>1</sup>Laboratoire des systèmes perceptifs, Département d'études cognitives, École normale supérieure, PSL University, CNRS, 75005 Paris, France. <sup>2</sup>Department of translational research and New technologies in medicine and Surgery, University of Pisa, Pisa, Italy. <sup>3</sup>Institute of Neuroscience CNR, Pisa, Italy.

<sup>4</sup>Department of Ophthalmology, Policlinico Gemelli, Università Cattolica del Sacro Cuore, Rome, Italy.

<sup>5</sup>IRCCS Stella Maris, Calambrone (Pisa), Italy

## Supplementary Material

|                                                        | Monocular Mean Phase Duration |      |      | Mixed percepts Mean Phase Duration |      |      |
|--------------------------------------------------------|-------------------------------|------|------|------------------------------------|------|------|
|                                                        | Pearson's r                   | p    | BF   | Pearson's r                        | p    | BF   |
| BCVA<br>Deprived Eye                                   | 0.15                          | 0.62 | 0.23 | 0.1                                | 0.73 | 0.21 |
| Contrast Sensitivity<br>impairment<br>Deprived Eye     | -0.08                         | 0.79 | 0.21 | -0.25                              | 0.4  | 0.28 |
| Visual Field size (V4e)<br>Deprived Eye                | -0.01                         | 0.98 | 0.20 | 0.16                               | 0.59 | 0.23 |
| fERG amplitude<br>Deprived Eye                         | 0.05                          | 0.88 | 0.22 | -0.27                              | 0.4  | 0.31 |
| BCVA<br>Non-Deprived Eye                               | 0.15                          | 0.61 | 0.23 | 0.02                               | 0.94 | 0.2  |
| Contrast Sensitivity<br>impairment<br>Non-Deprived Eye | -0.1                          | 0.73 | 0.21 | -0.26                              | 0.38 | 0.28 |
| Visual Field size (V4e)<br>Non-Deprived Eye            | -0.01                         | 0.99 | 0.20 | 0.23                               | 0.42 | 0.28 |
| fERG amplitude<br>Non-Deprived Eye                     | -0.1                          | 0.77 | 0.22 | -0.23                              | 0.47 | 0.28 |

**Table S1. Correlations between binocular rivalry features and visual parameters.**

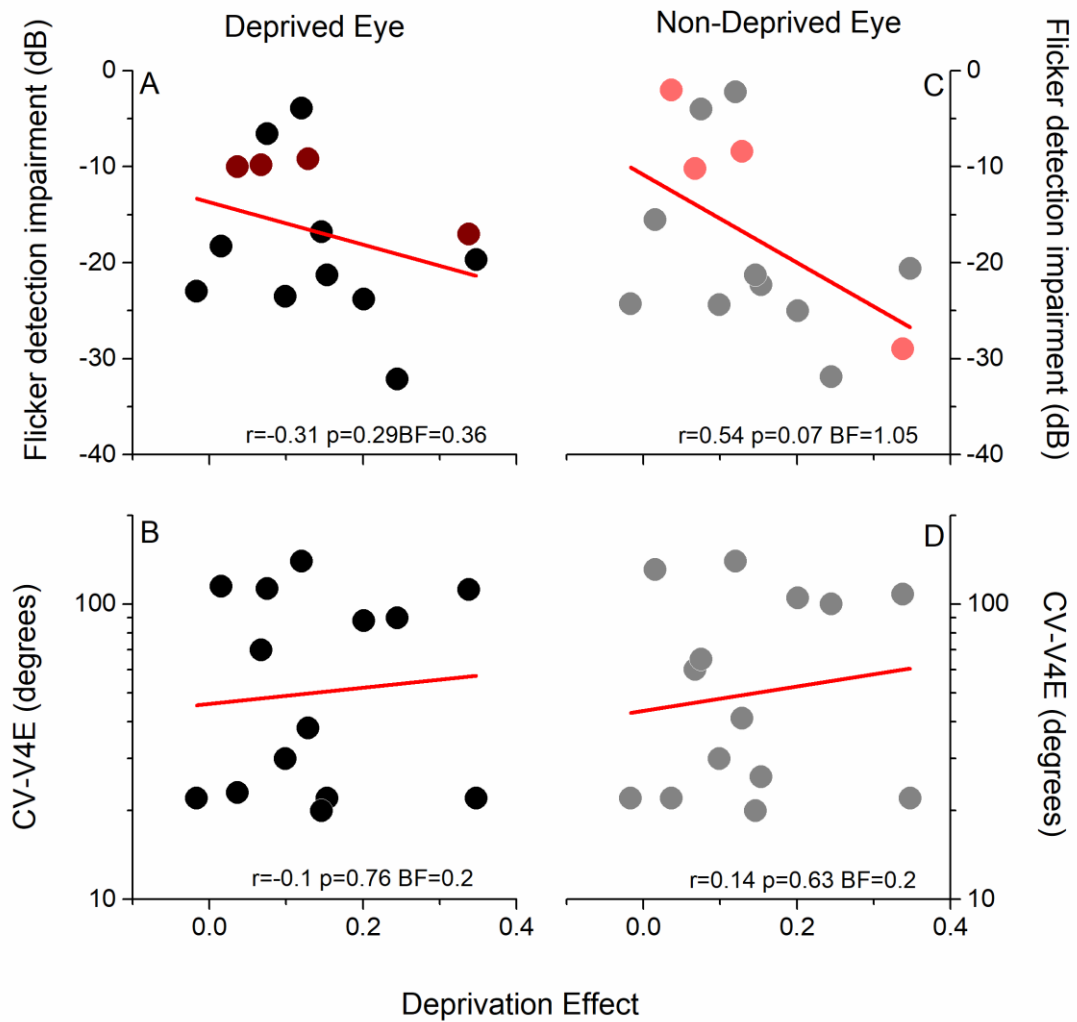

**Figure S1. Correlations between the effect of monocular, flicker detection impairment and spared visual field size.**

The effect of monocular deprivation (shift in ocular dominance towards the deprived eye) does not correlate across subjects either with the flicker detection impairment (A-C) or the size of the spared visual field (B-D), either of the deprived (A-B) or non-deprived (C-D) eye. Dark and light red symbols in panels A and C represent the four patients tested with a different setup probing motion direction discrimination.

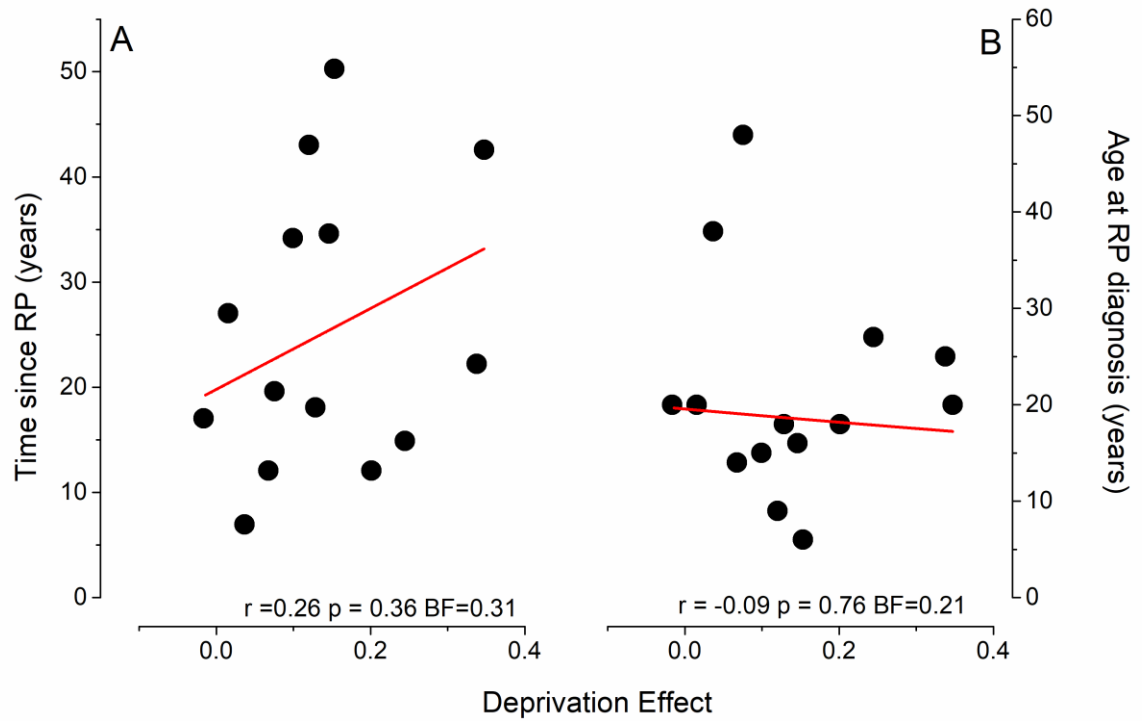

**Figure S2. Correlations between the effect of monocular deprivation and other RP related variables.**

The effect of monocular deprivation (shift in ocular dominance towards the deprived eye) does not correlate across subjects either with the duration (A) or the onset (B) of the disease.
